# Supplementary material
Source: Springer Nature journal article supplement (https://www.springermedizin.de/resource/supplementary/12906_2011_1042_MOESM2_ESM.pdf/9520372)

Data.01

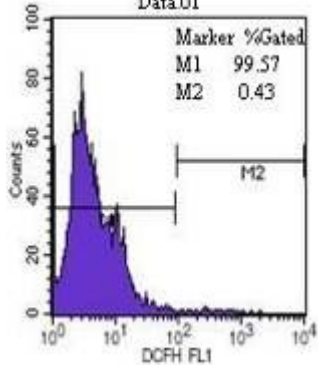

Data.02

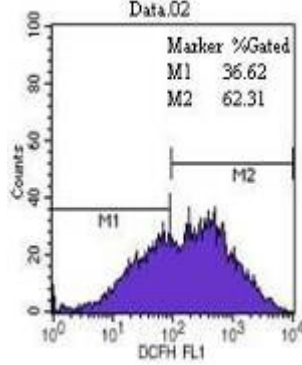

Data.03

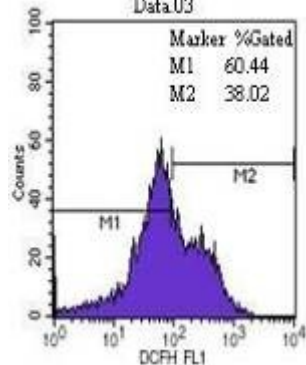

Data.04

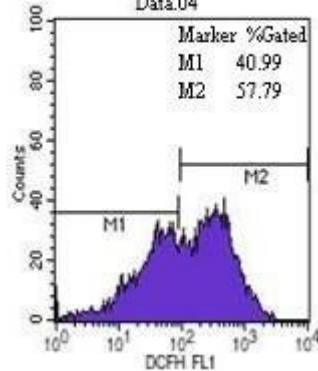

Data.05

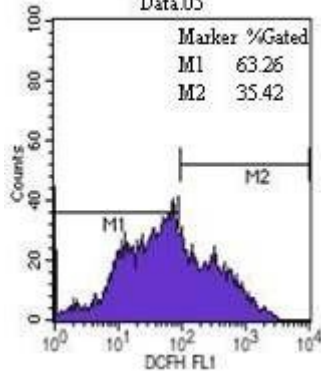

Data.06

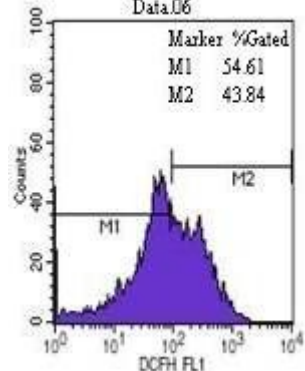

Supplement: MOESM2 [file 9520372]
